# Supplementary material for: The effect of temperature on birth rates in Europe
Source: Springer Nature journal article supplement (doi:10.1007/s11111-024-00450-x), 2024-03-01
Supplement: MOESM1 [file 26827868]

Supplementary Materials for

**The effect of temperature on birth rates in Europe**

This PDF file includes:

Fig. A1-A8

Table A1-A5

**Fig. A1: The effect of a 20-25°C day on birth rates**

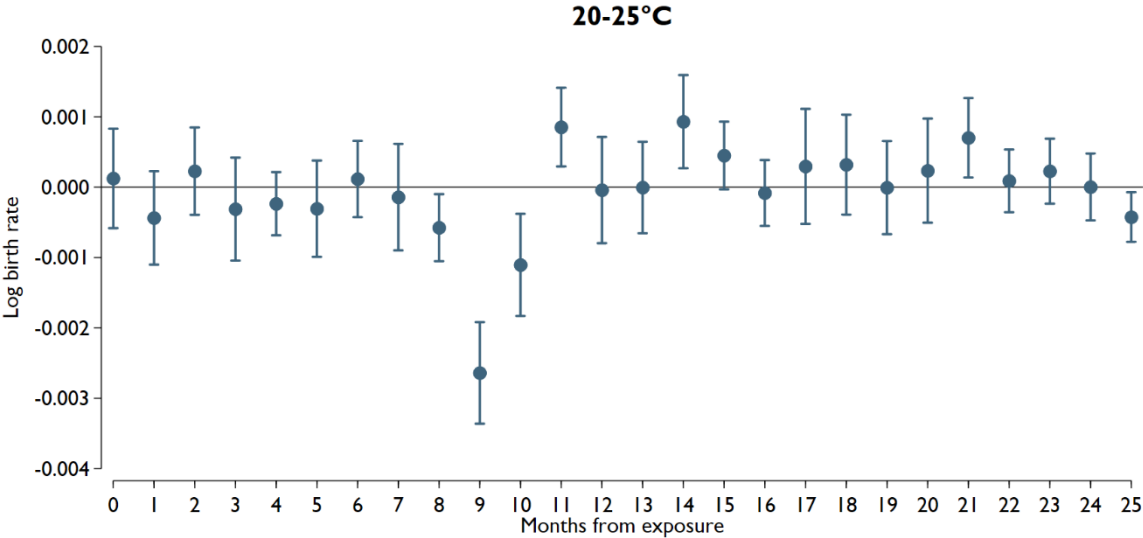

Notes: The error bars represent 95% confidence intervals. The effects are compared to a day with a mean temperature of 5–10°C. The model has country-by-year, country-by-month, and year-by-month fixed effects and country-by-month-specific quadratic time trends. Precipitation and relative humidity are controlled for. The regressions are weighted by the countries' female population at the beginning of the year. Standard errors are clustered by country. N=15,624.

**Fig. A2: Estimations based on a balanced panel of countries**

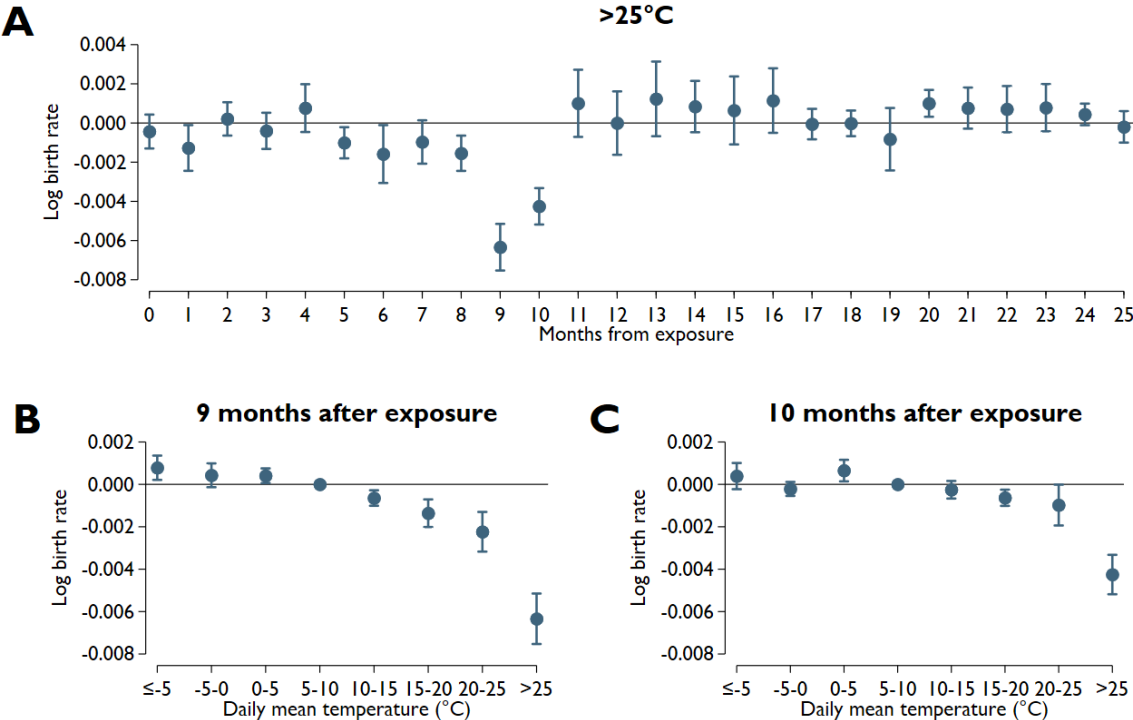

Notes: Only countries with full coverage between 1969 and 2021 are included. The error bars represent 95% confidence intervals. The effects are compared to a day with a mean temperature of 5–10°C. The model has country-by-year, country-by-month, and year-by-month fixed effects and country-by-month-specific quadratic time trends. Precipitation and relative humidity are controlled for. The regressions are weighted by the countries’ female population at the beginning of the year. Standard errors are clustered by country. N=10,176.

**Fig. A3: Estimations using the log number of births per 100,000 women aged 15-44 as the dependent variable**

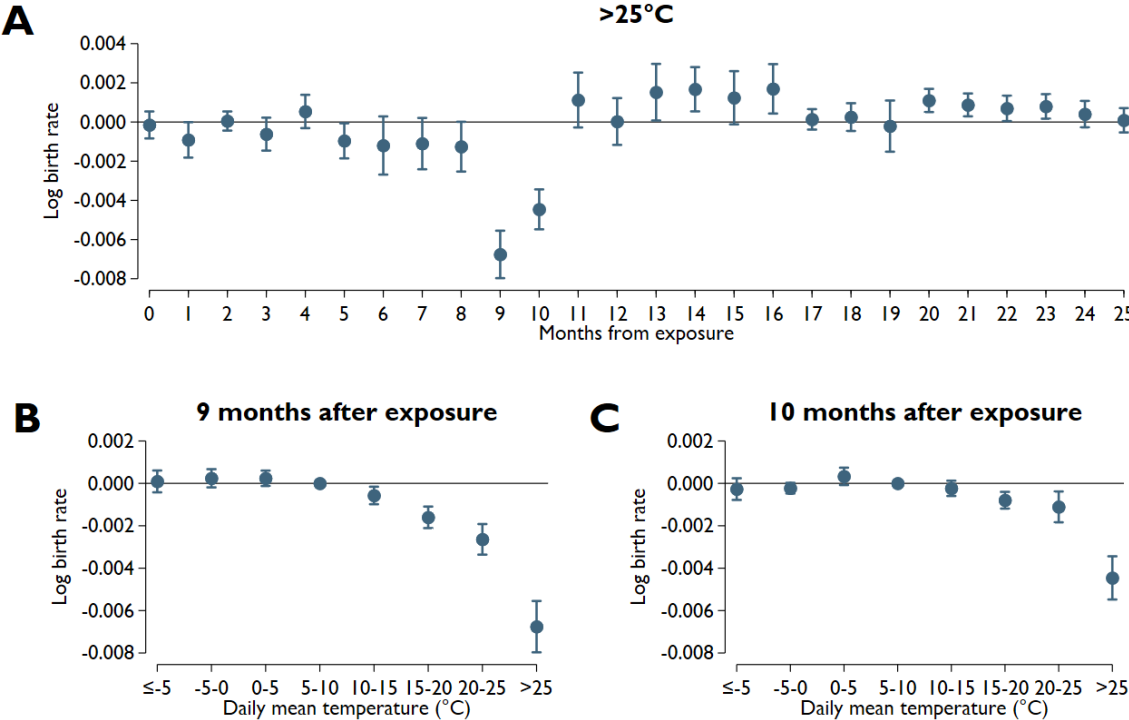

Notes: The error bars represent 95% confidence intervals. The effects are compared to a day with a mean temperature of 5–10°C. The model has country-by-year, country-by-month, and year-by-month fixed effects and country-by-month-specific quadratic time trends. Precipitation and relative humidity are controlled for. The regressions are weighted by the countries' female population at the beginning of the year. Standard errors are clustered by country. N=15,540.

**Fig. A4: Estimations using the log number of births as the dependent variable**

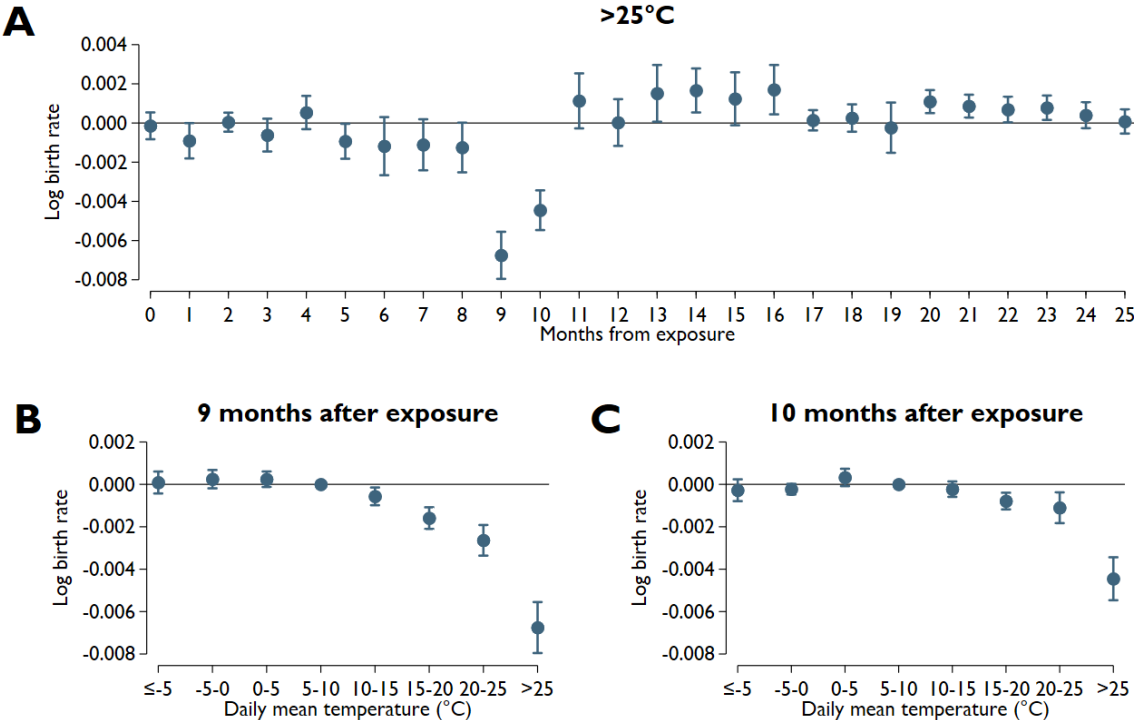

Notes: The error bars represent 95% confidence intervals. The effects are compared to a day with a mean temperature of 5–10°C. The model has country-by-year, country-by-month, and year-by-month fixed effects and country-by-month-specific quadratic time trends. Precipitation and relative humidity are controlled for. The regressions are weighted by the countries’ female population at the beginning of the year. Standard errors are clustered by country. N=15,624.

**Fig. A5: Estimations using the monthly mean temperature**

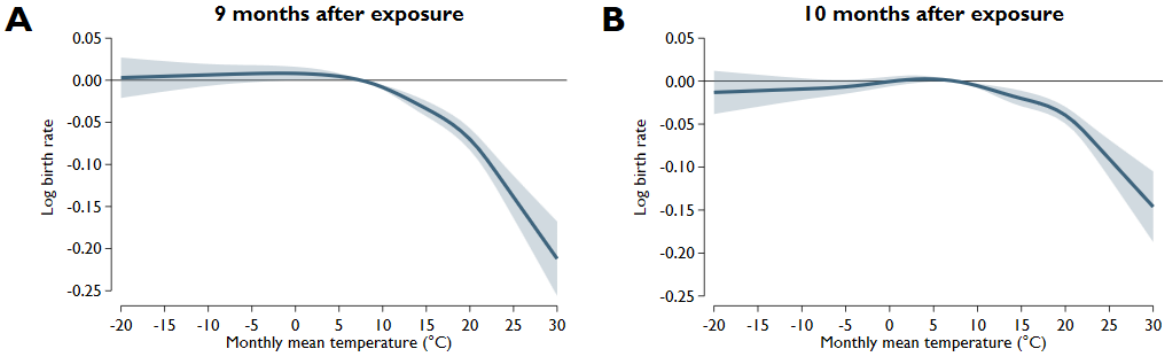

Notes: The temperature estimates come from restricted cubic spline functions with six knots. The shaded areas represent 95% confidence intervals. The reference temperatures are 7.5 °C. The model has country-by-year, country-by-month, and year-by-month fixed effects and country-by-month-specific quadratic time trends. Precipitation and relative humidity are controlled for. The regressions are weighted by the countries' female population at the beginning of the year. Standard errors are clustered by country. N=15,624.

**Fig. A6: Estimations using the maximum temperature**

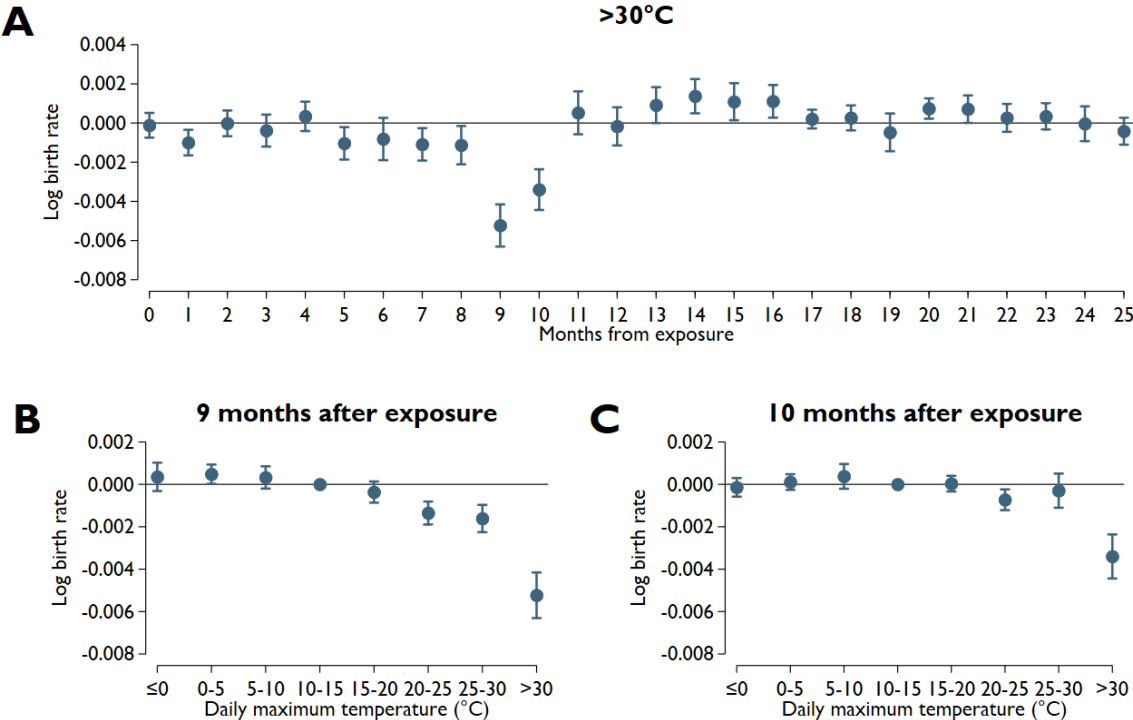

Notes: The error bars represent 95% confidence intervals. The effects are compared to a day with a maximum temperature of 10–15°C. The model has country-by-year, country-by-month, and year-by-month fixed effects and country-by-month-specific quadratic time trends. Precipitation and relative humidity are controlled for. The regressions are weighted by the countries’ female population at the beginning of the year. Standard errors are clustered by country. N=15,624.

**Fig. A7: Estimations using the minimum temperature**

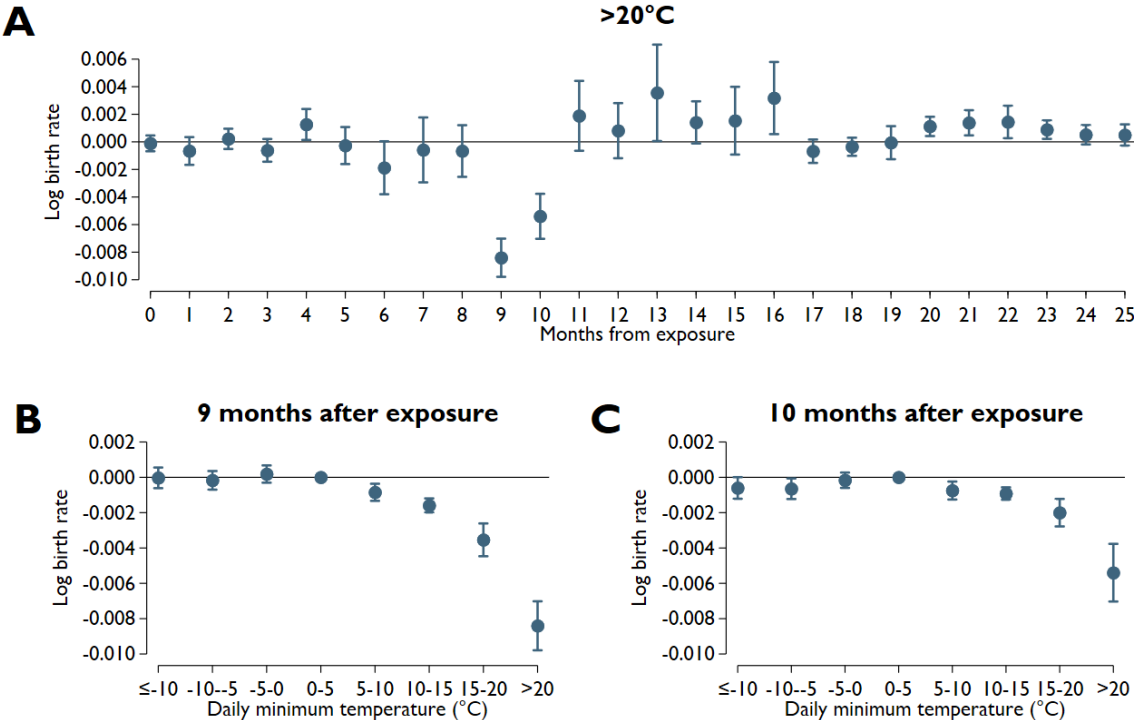

Notes: The error bars represent 95% confidence intervals. The effects are compared to a day with a minimum temperature of 0–5°C. The model has country-by-year, country-by-month, and year-by-month fixed effects and country-by-month-specific quadratic time trends. Precipitation and relative humidity are controlled for. The regressions are weighted by the countries’ female population at the beginning of the year. Standard errors are clustered by country. N=15,624.



**Fig. A8: The temperature-birth rate relationship by decade (the effect of a day with an average temperature of  $>25^{\circ}$ )**

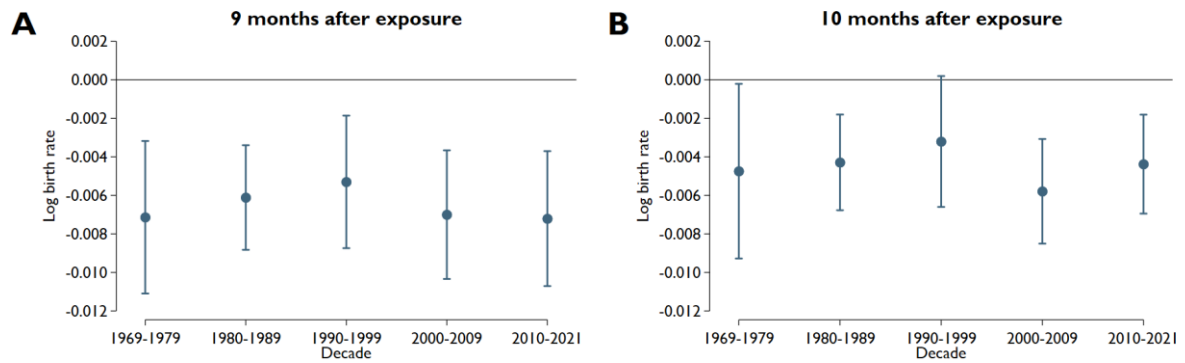

Notes: The error bars represent 95% confidence intervals. The effects are compared to a day with a mean temperature of  $5-10^{\circ}\text{C}$ . Only countries with full coverage between 1969 and 2021 are included. The model includes lags 0-25 but only lags 9 and 10 are shown (see Eq. 1). In this model, each weather variable is interacted with an indicator for a given decade. The model has country-by-year, country-by-month, and year-by-month fixed effects and country-by-month-specific quadratic time trends. Precipitation and relative humidity are controlled for. The regressions are weighted by the countries' female population at the beginning of the year.  $N=10,176$ .

**Table A1: Spatial and temporal coverage of the sample**

| Country | Years     |
|---------|-----------|
| AUT     | 1969-2021 |
| BEL     | 1969-2021 |
| BGR     | 1994-2021 |
| CHE     | 1969-2021 |
| CZE     | 1992-2021 |
| DEU     | 1969-2021 |
| DNK     | 1969-2021 |
| ESP     | 1969-2021 |
| EST     | 1969-2021 |
| FIN     | 1969-2021 |
| FRA     | 1994-2021 |
| GBR     | 1973-2018 |
| GRC     | 1969-2021 |
| HRV     | 1994-2021 |
| HUN     | 1994-2021 |
| IRL     | 1969-2021 |
| ITA     | 1969-2021 |
| LIE     | 1980-2021 |
| LTU     | 1994-2021 |
| LUX     | 1969-2021 |
| LVA     | 1996-2021 |
| MKD     | 1994-2021 |
| MNE     | 2005-2021 |
| NLD     | 1969-2021 |
| NOR     | 1969-2021 |
| POL     | 1995-2021 |
| PRT     | 1969-2021 |
| ROU     | 1995-2021 |
| SRB     | 2005-2021 |
| SVK     | 1996-2021 |
| SVN     | 1994-2021 |
| SWE     | 1969-2021 |

**Table A2: Sensitivity tests**

|                             | (1)                    | (2)                    | (3)                    | (4)                    | (5)                              | (6)                    |
|-----------------------------|------------------------|------------------------|------------------------|------------------------|----------------------------------|------------------------|
| Daily mean temperature (°C) | Baseline               | C-Y-S FE               | R-Y-M FE               | Unweighted             | Excl. precipitation and humidity | SE clustering: C + YM  |
| 9 months from exposure      |                        |                        |                        |                        |                                  |                        |
| ≤-5°C                       | 0.0001 (0.0003)        | -0.0004 (0.0003)       | 0.0004 (0.0003)        | 0.0011 (0.0007)        | 0.0001 (0.0002)                  | 0.0001 (0.0003)        |
| -5-0°C                      | 0.0002 (0.0002)        | -0.0001 (0.0002)       | 0.0000 (0.0002)        | -0.0006 (0.0005)       | 0.0005* (0.0002)                 | 0.0002 (0.0003)        |
| 0-5°C                       | 0.0002 (0.0002)        | 0.0002 (0.0002)        | 0.0005** (0.0002)      | 0.0003 (0.0002)        | 0.0003 (0.0002)                  | 0.0002 (0.0002)        |
| 5-10°C                      | ref. cat.                        | ref. cat.              |
| 10-15°C                     | -0.0006** (0.0002)     | -0.0008* (0.0003)      | -0.0005* (0.0002)      | 0.0004 (0.0005)        | -0.0005* (0.0002)                | -0.0006* (0.0002)      |
| 15-20°C                     | -0.0016** (0.0003)     | -0.0018** (0.0003)     | -0.0015** (0.0004)     | -0.0013** (0.0003)     | -0.0014** (0.0002)               | -0.0016** (0.0003)     |
| 20-25°C                     | -0.0026** (0.0004)     | -0.0031** (0.0006)     | -0.0023** (0.0004)     | -0.0028** (0.0003)     | -0.0022** (0.0002)               | -0.0026** (0.0004)     |
| >25°C                       | -0.0068** (0.0006)     | -0.0073** (0.0008)     | -0.0060** (0.0006)     | -0.0059** (0.0006)     | -0.0058** (0.0005)               | -0.0068** (0.0007)     |
| 10 months from exposure     |                        |                        |                        |                        |                                  |                        |
| ≤-5°C                       | -0.0003 (0.0003)       | -0.0006 (0.0003)       | -0.0002 (0.0003)       | 0.0009 (0.0009)        | -0.0003 (0.0002)                 | -0.0003 (0.0003)       |
| -5-0°C                      | -0.0002 (0.0001)       | -0.0006* (0.0002)      | -0.0005 (0.0003)       | 0.0003 (0.0005)        | -0.0001 (0.0002)                 | -0.0002 (0.0002)       |
| 0-5°C                       | 0.0003 (0.0002)        | 0.0000 (0.0002)        | 0.0001 (0.0002)        | 0.0008 (0.0005)        | 0.0002 (0.0002)                  | 0.0003 (0.0002)        |
| 5-10°C                      | ref. cat.                        | ref. cat.              |
| 10-15°C                     | -0.0002 (0.0002)       | -0.0006 (0.0003)       | -0.0003 (0.0002)       | 0.0004 (0.0004)        | -0.0003 (0.0002)                 | -0.0002 (0.0002)       |
| 15-20°C                     | -0.0008** (0.0002)     | -0.0011** (0.0002)     | -0.0008** (0.0003)     | -0.0002 (0.0003)       | -0.0008** (0.0002)               | -0.0008** (0.0002)     |
| 20-25°C                     | -0.0011** (0.0004)     | -0.0013* (0.0005)      | -0.0009* (0.0004)      | -0.0009 (0.0008)       | -0.0011** (0.0002)               | -0.0011** (0.0004)     |
| >25°C                       | -0.0045** (0.0005)     | -0.0054** (0.0009)     | -0.0034** (0.0005)     | -0.0035** (0.0008)     | -0.0040** (0.0005)               | -0.0045** (0.0006)     |
| Fixed effects               | C-Y, C-M, Y-M          | C-Y-S, C-M, Y-M        | C-Y, C-M, R-Y-M        | C-Y, C-M, Y-M          | C-Y, C-M, Y-M                    | C-Y, C-M, Y-M          |
| Time trend                  | C-M-specific quadratic           | C-M-specific quadratic |
| Precipitation and humidity  | Yes                    | Yes                    | Yes                    | Yes                    | No                               | Yes                    |
| SE clustering               | C                      | C                      | C                      | C                      | C                                | C + Y-M                |
| Weighted                    | Yes                    | Yes                    | Yes                    | No                     | Yes                              | Yes                    |

Notes: Dependent variable: log birth rate. C-country, R-region, Y-year, S-season, M-month. Regions: (i) Southern Europe = Portugal, Spain, Italy, Greece, Croatia, Montenegro, North Macedonia, Serbia, Slovenia; (ii) Eastern Europe = Bulgaria, Czech Republic, Hungary, Slovakia, Romania, Poland; (iii) Northern Europe = Sweden, Norway, Finland, Denmark, Estonia, Lithuania, Latvia, Ireland, United Kingdom; (iv) Western Europe = Germany, France, Netherlands, Belgium, Luxembourg, Liechtenstein, Switzerland, Austria. N=15,624. \* p<0.05, \*\* p<0.01

**Table A3: Estimation using 2°C temperature categories above 20°C**

| Daily mean temperature (°C) | (1)<br>9 months from exposure | (2)<br>10 months from exposure |
|-----------------------------|-------------------------------|--------------------------------|
| ≤-5°C                       | 0.0001 (0.0002)               | -0.0003 (0.0003)               |
| -5-0°C                      | 0.0002 (0.0002)               | -0.0002 (0.0001)               |
| 0-5°C                       | 0.0003 (0.0002)               | 0.0003 (0.0002)                |
| 5-10°C                      | ref. cat.                     | ref. cat.                      |
| 10-15°C                     | -0.0005** (0.0002)            | -0.0002 (0.0002)               |
| 15-20°C                     | -0.0016** (0.0003)            | -0.0008** (0.0002)             |
| 20-22°C                     | -0.0030** (0.0006)            | -0.0012* (0.0006)              |
| 22-24°C                     | -0.0015 (0.0009)              | -0.0004 (0.0012)               |
| 24-26°C                     | -0.0058** (0.0015)            | -0.0038* (0.0016)              |
| 26-28°C                     | -0.0063** (0.0021)            | -0.0035 (0.0019)               |
| >28°C                       | -0.0070** (0.0019)            | -0.0056** (0.0018)             |

Notes: Dependent variable: log birth rate. The model includes lags 0-25 but only lags 9 and 10 are shown (see Eq. 1). The model has country-by-year, country-by-month, and year-by-month fixed effects and country-by-month-specific quadratic time trends. Precipitation and relative humidity are controlled for. The regressions are weighted by the countries' female population at the beginning of the year. Standard errors are clustered by country. N=15,624. \* p<0.05, \*\* p<0.01

**Table A4: The effect of heatwave days (alternative definitions)**

| Daily mean temperature (°C) | (1)                                          | (2)                                          |
|-----------------------------|----------------------------------------------|----------------------------------------------|
| 9 months from exposure      |                                              |                                              |
| ≤-5°C                       | 0.0001 (0.0002)                              | 0.0001 (0.0002)                              |
| -5-0°C                      | 0.0002 (0.0002)                              | 0.0002 (0.0002)                              |
| 0-5°C                       | 0.0002 (0.0002)                              | 0.0002 (0.0002)                              |
| 5-10°C                      | ref. cat.                                    | ref. cat.                                    |
| 10-15°C                     | -0.0006** (0.0002)                           | -0.0006** (0.0002)                           |
| 15-20°C                     | -0.0016** (0.0003)                           | -0.0016** (0.0003)                           |
| 20-25°C                     | -0.0027** (0.0004)                           | -0.0026** (0.0004)                           |
| >25°C: non-heatwave day     | -0.0044 (0.0026)                             | -0.0063** (0.0017)                           |
| >25°C: heatwave day         | -0.0073** (0.0006)                           | -0.0073** (0.0006)                           |
| 10 months from exposure     |                                              |                                              |
| ≤-5°C                       | -0.0003 (0.0002)                             | -0.0003 (0.0002)                             |
| -5-0°C                      | -0.0002 (0.0001)                             | -0.0002 (0.0001)                             |
| 0-5°C                       | 0.0003 (0.0002)                              | 0.0003 (0.0002)                              |
| 5-10°C                      | ref. cat.                                    | ref. cat.                                    |
| 10-15°C                     | -0.0002 (0.0002)                             | -0.0002 (0.0002)                             |
| 15-20°C                     | -0.0008** (0.0002)                           | -0.0008** (0.0002)                           |
| 20-25°C                     | -0.0014** (0.0003)                           | -0.0013** (0.0003)                           |
| >25°C: non-heatwave day     | 0.0003 (0.0019)                              | -0.0030* (0.0013)                            |
| >25°C: heatwave day         | -0.0054** (0.0005)                           | -0.0055** (0.0004)                           |
| Heatwave definition         | A period of at least 2 consecutive hot days. | A period of at least 4 consecutive hot days. |

Notes: Dependent variable: log birth rate. The model includes lags 0-25 but only lags 9 and 10 are shown (see Eq. 1). The model has country-by-year, country-by-month, and year-by-month fixed effects and country-by-month-specific quadratic time trends. Precipitation and relative humidity are controlled for. The regressions are weighted by the countries' female population at the beginning of the year. Standard errors are clustered by country. N=15,624. \* p<0.05, \*\* p<0.01

**Table A5: The effect of temperature on log birth rates by climate (alternative estimation)**

| Daily mean temperature (°C) | (1)<br>Hot climate | (2)<br>Cold climate |
|-----------------------------|--------------------|---------------------|
| 9 months from exposure      |                    |                     |
| ≤-5°C                       | 0.0003 (0.0017)    | 0.0003 (0.0003)     |
| -5-0°C                      | -0.0008 (0.0007)   | 0.0002 (0.0006)     |
| 0-5°C                       | 0.0010 (0.0005)    | 0.0008 (0.0004)     |
| 5-10°C                      | ref. cat.          | ref. cat.           |
| 10-15°C                     | -0.0003 (0.0004)   | 0.0001 (0.0003)     |
| 15-20°C                     | -0.0016* (0.0006)  | -0.0007* (0.0003)   |
| 20-25°C                     | -0.0020** (0.0006) | -0.0025** (0.0007)  |
| >25°C                       | -0.0063** (0.0008) | -0.0121* (0.0054)   |
| 10 months from exposure     |                    |                     |
| ≤-5°C                       | 0.0007 (0.0021)    | 0.0002 (0.0005)     |
| -5-0°C                      | -0.0014 (0.0009)   | 0.0003 (0.0004)     |
| 0-5°C                       | 0.0008 (0.0005)    | 0.0005 (0.0004)     |
| 5-10°C                      | ref. cat.          | ref. cat.           |
| 10-15°C                     | -0.0000 (0.0003)   | 0.0005 (0.0006)     |
| 15-20°C                     | -0.0009* (0.0004)  | -0.0000 (0.0003)    |
| 20-25°C                     | -0.0005 (0.0006)   | -0.0015 (0.0008)    |
| >25°C                       | -0.0041** (0.0006) | -0.0147** (0.0033)  |

Notes: Warm climate countries as those with an average annual temperature above 10.5°C and cold climate countries as those with an average annual temperature below 8°C. Dependent variable: log birth rate. The model includes lags 0-25 but only lags 9 and 10 are shown (see Eq. 1). The model has country-by-year, country-by-month, and year-by-month fixed effects and country-by-month-specific quadratic time trends. Precipitation and relative humidity are controlled for. The regressions are weighted by the countries' female population at the beginning of the year. Standard errors are clustered by country. N=8,856. \* p<0.05, \*\* p<0.01
